# Supplementary material for: Processive acceleration of actin barbed-end assembly by N-WASP
Source: PubMed Central journal article supplement — Mol Biol Cell. 2014 Jan 1;25(1):55–65. doi: 10.1091/mbc.E12-11-0781 (PMC3873893; doi:10.1091/mbc.e12-11-0781), 2014-01-01
Supplement: supp_E12-11-0781v1_CombinedSupMats.pdf [file supp_E12-11-0781v1_CombinedSupMats.pdf]

# Supplemental Materials

*Molecular Biology of the Cell*

Khanduja et al.

## SUPPLEMENTARY FIGURES AND LEGENDS

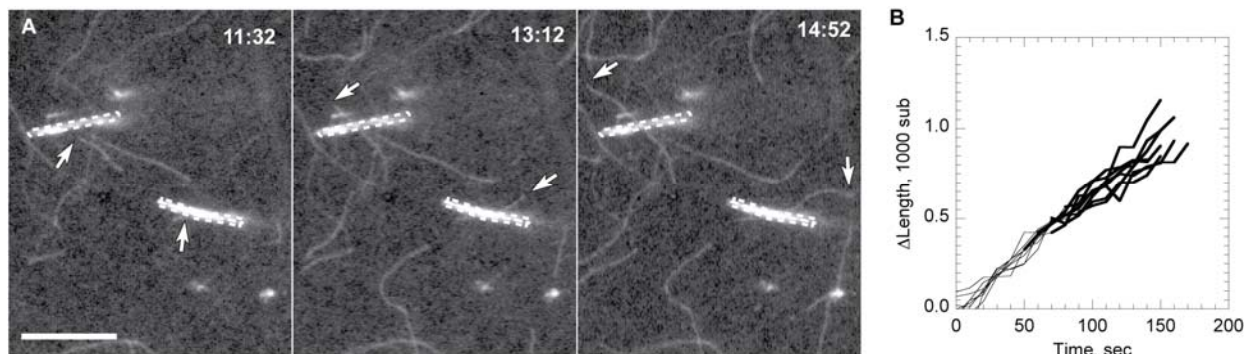

**Supplementary Figure 1. Actin filaments do not interact with control, BSA blocked nanofibers.** Conditions as in Figure 1 except control nanofibers were blocked only with 1 mg/ml (0.1% FITC labeled) BSA. (A) Time-lapse TIRF microscopy image of barbed end of actin filaments (*white arrow*) growing past BSA coated nanofibers. (B) Barbed end elongation rate of filaments that grew past nanofibers. Growth rates remained the same before (*thin line*) and after (*thick line*) encountering the nanofiber (see Supplementary Movie 6). Scale bar, 10  $\mu\text{m}$ .

## SUPPLEMENTARY MOVIE LEGENDS

**Supplementary Movie 1. Single filament capture is non-processive.** Conditions as in Figure 1. Time-lapse TIRF microscopy movie of elongating barbed ends (*arrowhead*) attached to a GST-PP-WWCA coated nanofiber. Barbed ends polymerized either parallel to the nanofiber long axis at the diffusion-limited rate (*white arrowhead*) or perpendicular to the nanofiber at a substantially reduced rate (*black arrowhead*).

**Supplementary Movie 2. Rapid processive elongation in standard magnesium.** Conditions as in Figure 2. Time-lapse TIRF microscopy movie of sustained processive elongation of actin filaments on GST-PP-WWCA coated glass nanofibers (*black arrowhead*) in 1 mM  $Mg^{2+}$  with barbed ends attached to nanofibers (*white arrowhead*).

**Supplementary Movie 3. Rapid processive elongation in high magnesium.** Conditions as in Figure 2. Time-lapse TIRF microscopy movie of sustained rapid elongation of actin filaments (*black arrowhead*) with barbed ends attached to GST-PP-WWCA nanofibers in 10 mM  $Mg^{2+}$ .

**Supplementary Movie 4. Rapid processive elongation in standard magnesium.** Conditions as in Figure 2 except with 10 mM total  $Mg^{2+}$ . Time-lapse TIRF microscopy movie of two elongating actin filaments (black arrowheads). Filament barbed ends are bundled (open arrowhead) and lead to a nearby GST-PP-WWCA nanofibers. The lower filament undergoes sustained, rapid elongation, while the upper filament elongates at the normal rate.

**Supplementary Movie 5. Profilin slows rate of bundle mediated processive elongation.** Conditions as in Figure 3. Time-lapse TIRF microscopy movie of sustained processive association of profilin-actin with actin filaments barbed ends attached to GST-PP-WWCA coated nanofibers resulting in filament buckling (*black arrowhead*).

**Supplementary Movie 6. Filaments do not interact with BSA blocked nanofibers.** Conditions as in Supplementary Figure 1. Time-lapse TIRF microscopy movie of barbed end of actin filaments (*black arrowhead*) growing past FITC-BSA coated nanofibers.
